# Supplementary material for: Tanshinone IIA regulates microRNA-125b/foxp3/caspase-1 signaling and inhibits cell viability of nasopharyngeal carcinoma
Source: PubMed Central journal article supplement — Mol Med Rep. 2021 Mar 16;23(5):371. doi: 10.3892/mmr.2021.12010 (PMC7985994; doi:10.3892/mmr.2021.12010), 2021-03-16
Supplement: Supplementary_Data.pdf [file Supplementary_Data.pdf]

Table SI. Primers used for reverse transcription-quantitative PCR.

| Gene          | Sequence                      |
|---------------|-------------------------------|
| GSDMD-FWD     | 5'-ATATCTGCCAGAGATTGATA-3'    |
| GSDMD-REV     | 5'-TGGAAGTATCTTTGCCGGT-3'     |
| Caspase-1-FWD | 5'-CACAGCTCTGGAGATGGTGA-3'    |
| Caspase-1-REV | 5'-GGTCCCACATATCCCTCCT-3'     |
| miR-125b-FWD  | 5'-CCTGAGACCCTAACTTG-3'       |
| miR-125b-REV  | 5'-GAACATGTCTGCGTATCTC-3'     |
| Foxp3-FWD     | 5'-GGCACAATGTCTCCTCCAGAGA-3'  |
| Foxp3-REV     | 5'-CAGATGAAGCCTTGGTCAGTGC-3'  |
| Actin-FWD     | 5'-TGGACTTCGAGCAGGAAATGG-3'   |
| Actin-REV     | 5'-ACGTGCGCAC TTCATGATCGAG-3' |
| U6-FWD        | 5'-ATTGGAACGATACAGAGAAGATT-3' |
| U6-REV        | 5'-GGAACGCTTCACGAATTTG-3'     |

GSDMD, gasdermin D; miR, microRNA; FWD, forward; REV, reverse.
